# Supplementary material
Source: Springer Nature journal article supplement (https://www.springermedizin.de/resource/supplementary/13054_2011_505_MOESM2_ESM.pdf/9708630)

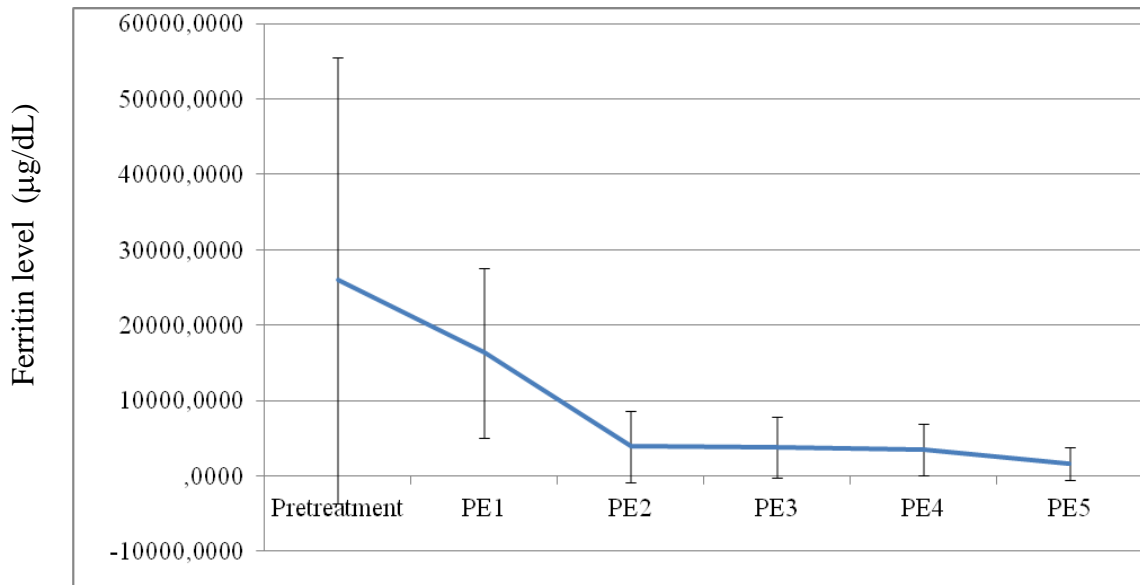

Plasma exchange sessions

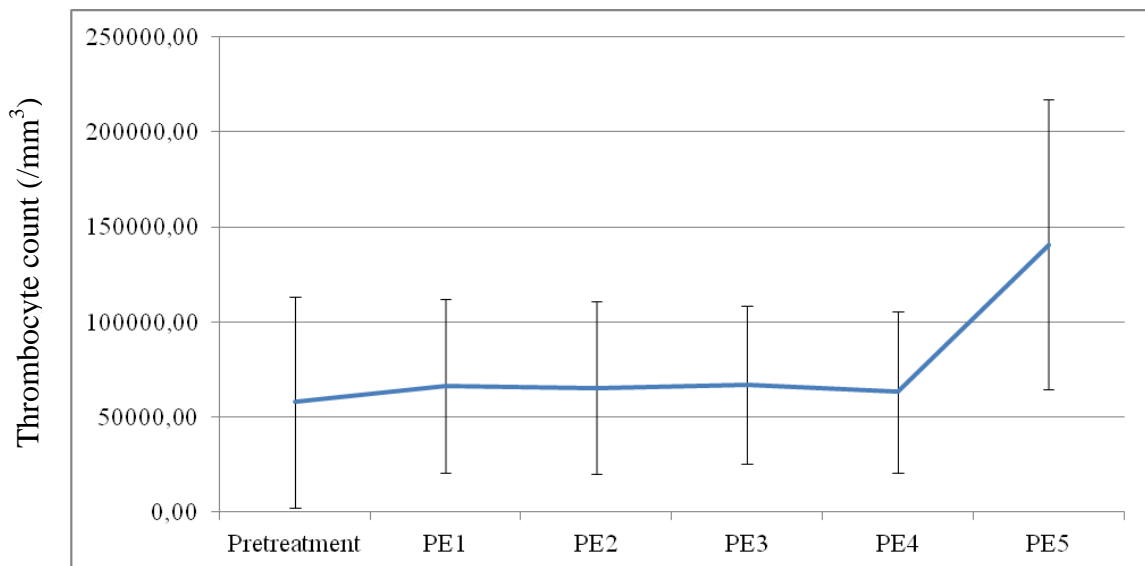

Plasma exchange sessions

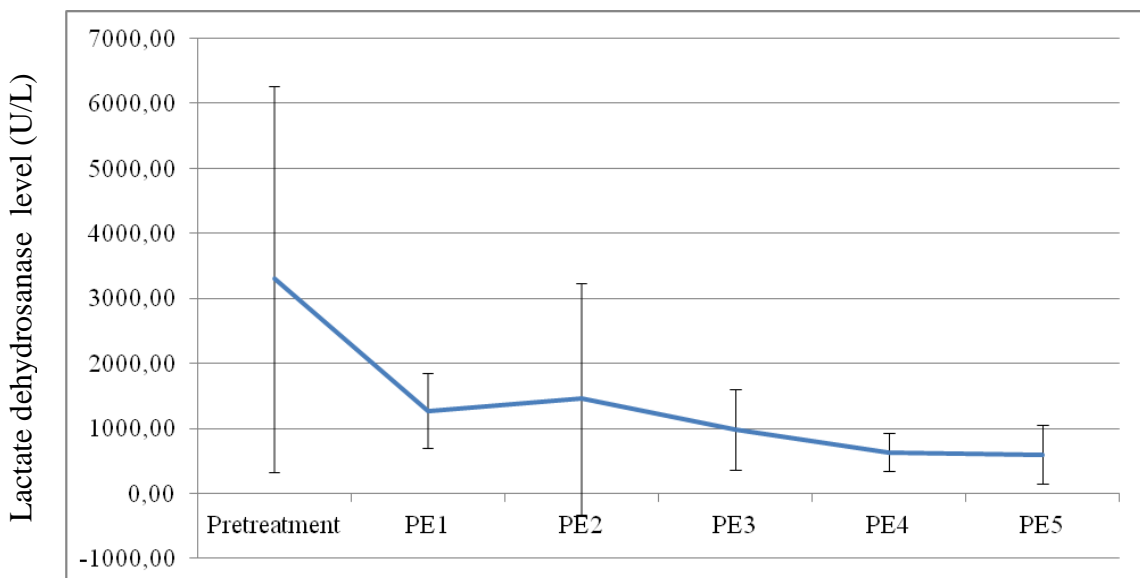

Plasma exchange sessions

Supplement: MOESM2 [file 9708630]
